# Supplementary material for: Sex-specific regulation of chemokine Cxcl5/6 controls neutrophil recruitment and tissue injury in acute inflammatory states
Source: PubMed Central journal article supplement (PMC4661984; doi:10.1186/s13293-015-0047-5), 2015-11-26

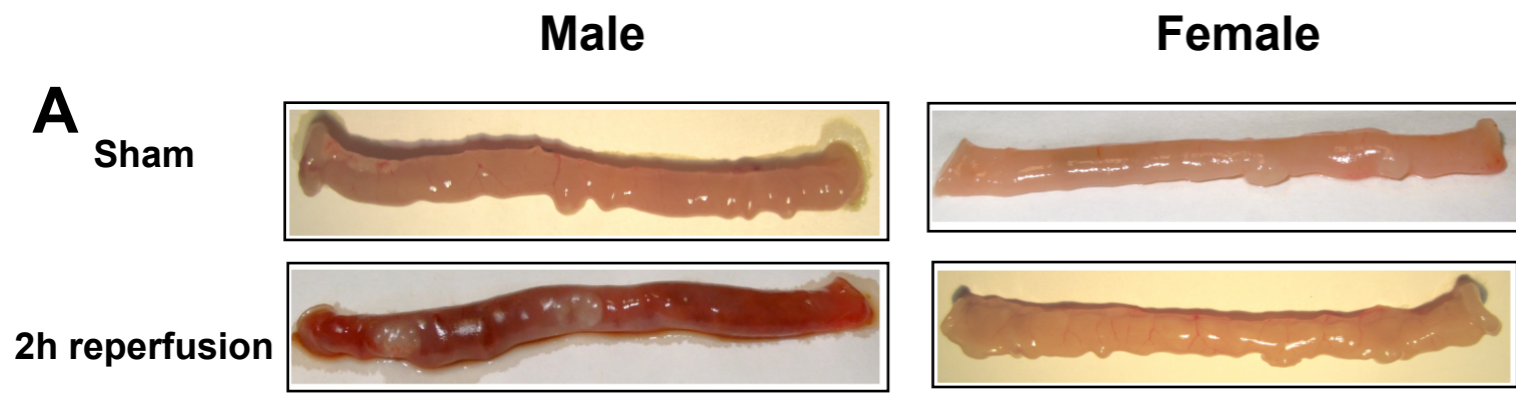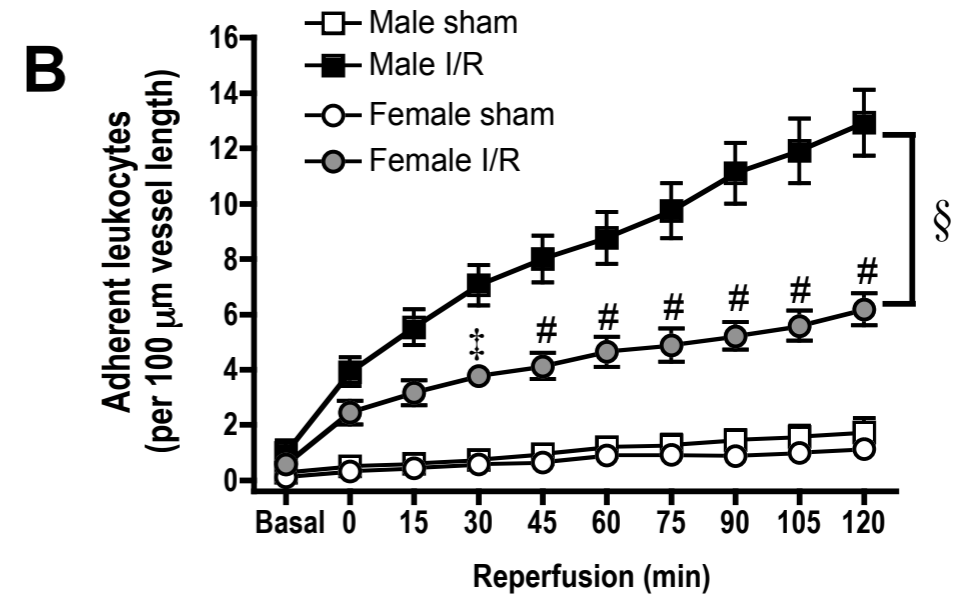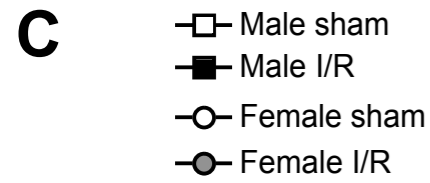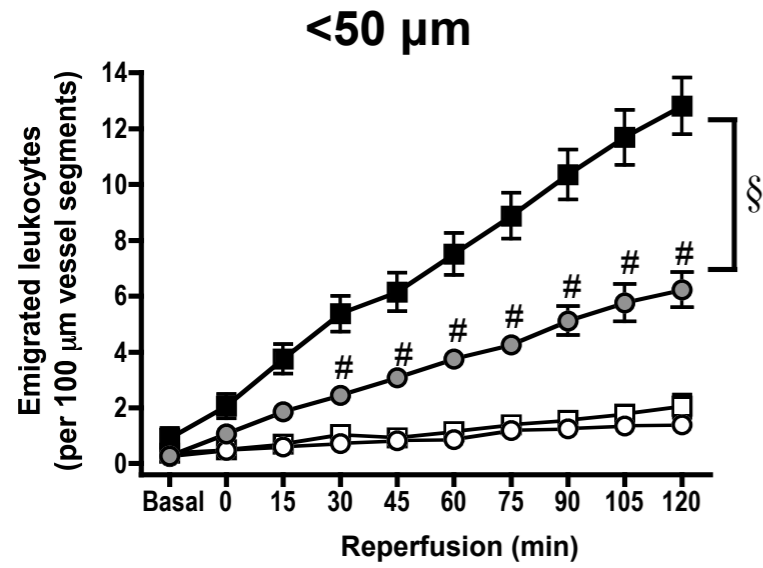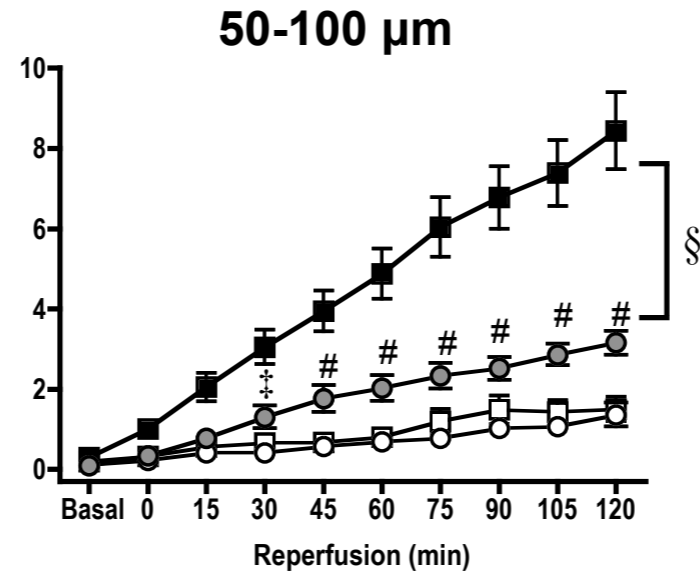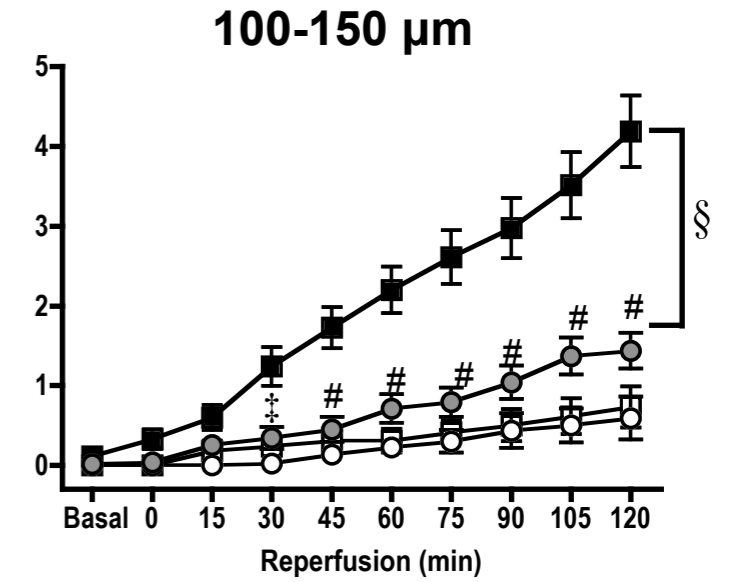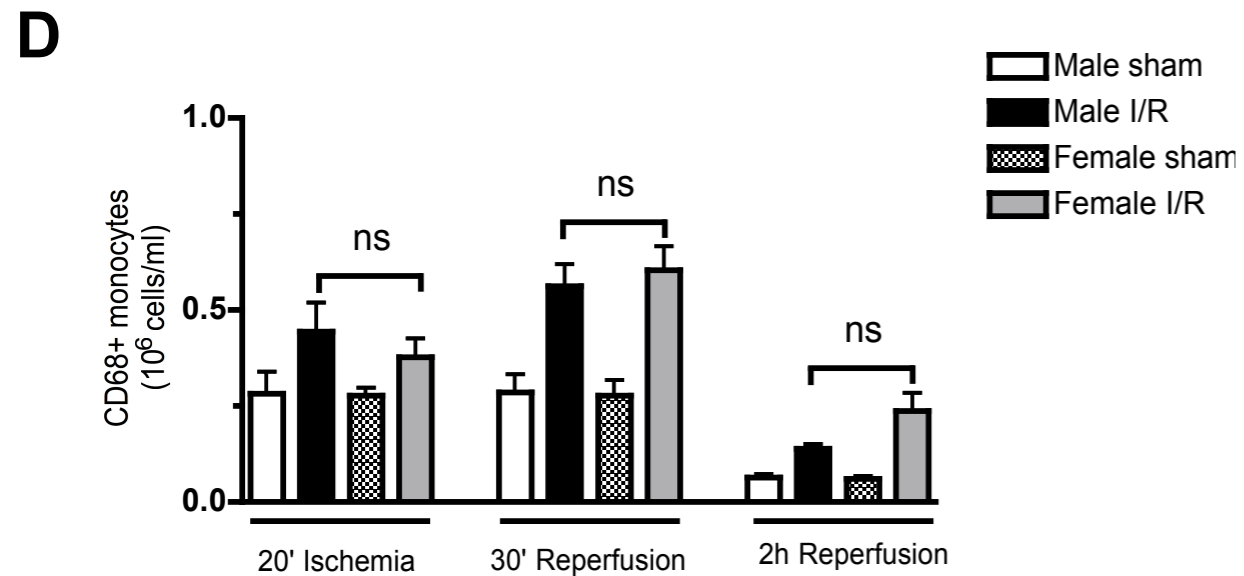

Supplement: 13293_2015_47_MOESM2_ESM.pdf [file 13293_2015_47_MOESM2_ESM.pdf]
